# Supplementary material
Source: PubMed Central journal article supplement (PMC4193934)
Supplement: embj0033-1011-sd1.pdf [file embj0033-1011-sd1.pdf]

**A**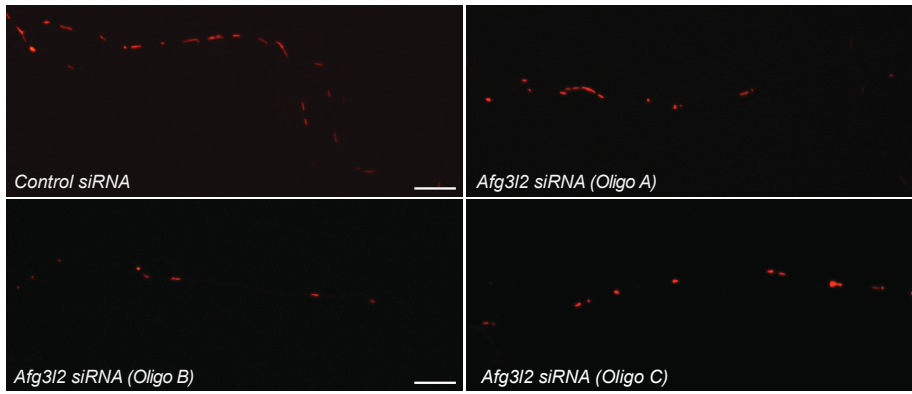**B**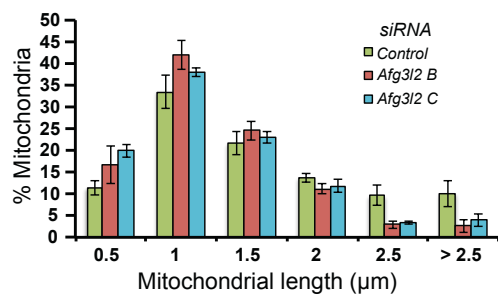**C**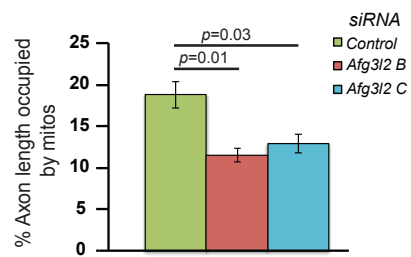**D**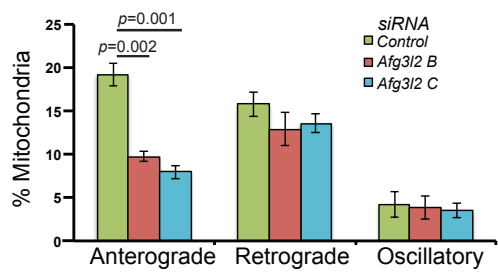

### Figure S1. Depletion of AFG3L2 causes mitochondrial defects

(A) Representative images of axonal mitochondria in neurons downregulated with control siRNA and three different *Afg3l2* siRNAs. Scale bar: 10  $\mu$ m. (B) The percentage of mitochondria belonging to a given length bin was averaged from 3 independent experiments (124-167 mitochondria were measured in each experiment). Bars represent SEM.  $p$  values were calculated with the  $\chi^2$  test. Control vs. *Afg3l2* (oligo B):  $p = 0.008$ ; Control vs. *Afg3l2* (oligo C):  $p = 0.009$ . (C) Quantification of mitochondrial occupancy per axon ( $n = 3$  experiments; at least 8 axons per experiment). (D) Quantification of mitochondrial transport types in the axon. Data represent mean  $\pm$  SEM of 3 independent experiments. At least 8 axons from each experiment were analyzed.  $p$  values in C and D were determined with Student's  $t$ -test.

[Unfortunately, in this article, which was first published online on March 28th 2014, a wrong graph was inserted as Supplementary Figure S1B. The mistake has now been corrected. We apologize for any inconvenience caused.]
