# Supplementary material
Source: PubMed Central journal article supplement (PMC4193934)
Supplement: embj0033-1011-sd3.pdf [file embj0033-1011-sd3.pdf]

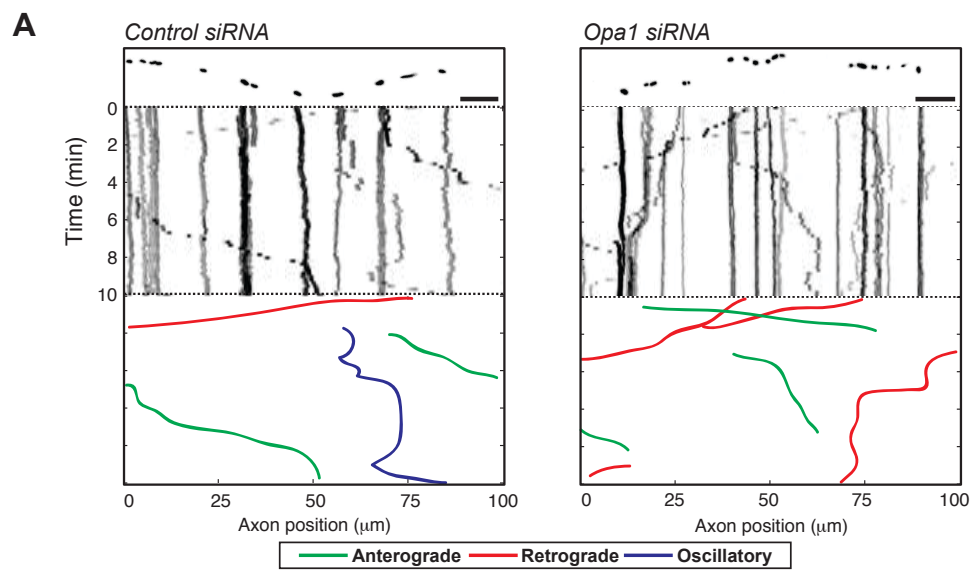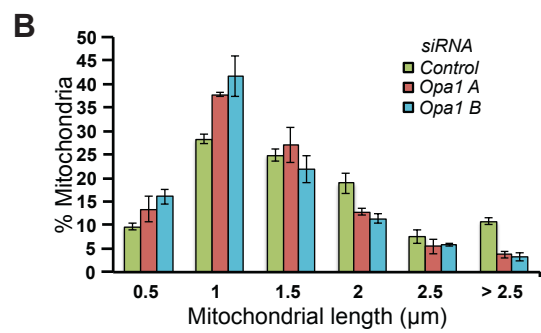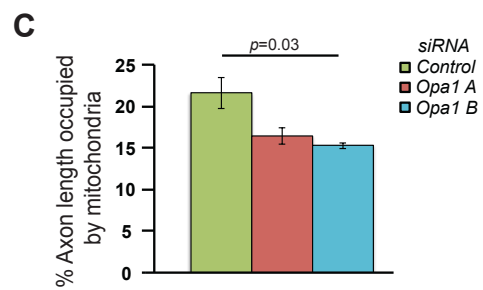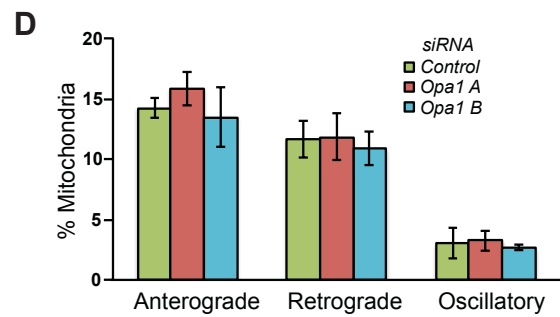

**Figure S3. Mitochondrial transport is not affected in *Opa1*-deficient axons**

(A) Representative kymographs of axons (shown above respective kymographs) from neurons co-transfected with mito-mCherry and control or *Opa1* siRNAs. Schematic of different colour-coded transport types is shown below. Bars: 10  $\mu\text{m}$  (B) The percentage of mitochondria belonging to a given length bin was averaged from 3 independent experiments (131-211 mitochondria were measured in each experiment). Bars represent SEM.  $p$  values were calculated with the  $\chi^2$  test. Control vs. *Opa1* (oligo A):  $p = 10^{-4}$ ; Control vs. *OPA1* (oligo B):  $p = 1.4 \times 10^{-6}$ . (C) Quantification of mitochondrial occupancy per axon ( $n = 3$  experiments; at least 8 axons per experiment).  $p$  value was determined with Student's  $t$ -test. (D) Quantification of mitochondrial transport types in the axon. Data represent mean  $\pm$  SEM of 3 independent experiments. At least 8 axons from each experiment were analyzed.
