# Supplementary material
Source: PubMed Central journal article supplement (PMC4193934)
Supplement: embj0033-1011-sd4.pdf [file embj0033-1011-sd4.pdf]

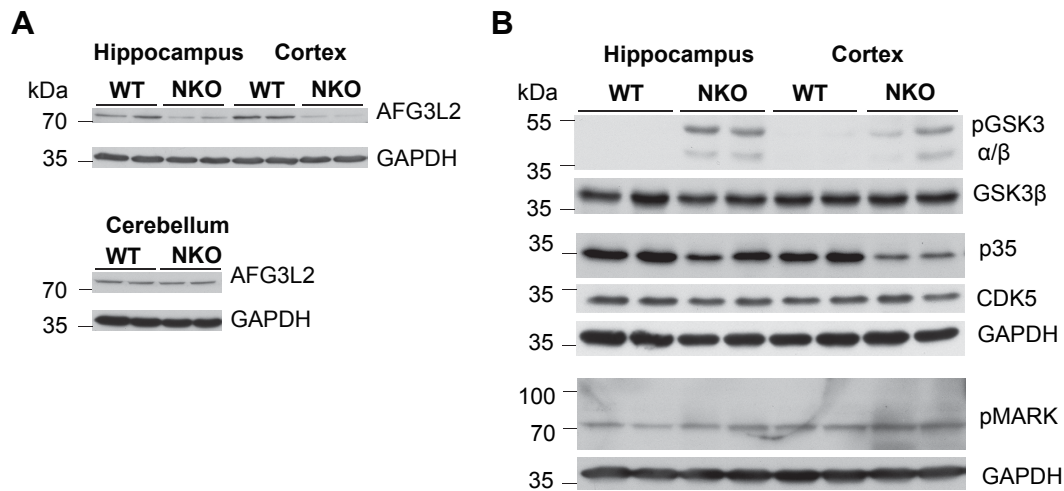

**Figure S4. Additional analyses in *Afg3l2*<sup>NKO</sup> mice.**

(A) Western blot analysis of AFG3L2 in control (*Afg3l2*<sup>fl/fl</sup>) and *Afg3l2*<sup>NKO</sup> (*Afg3l2*<sup>fl/fl</sup>; CamKIIα Cre) brain regions at 8 weeks of age. AFG3L2 is efficiently depleted in the cerebral cortex and hippocampus, while normal levels are found in the cerebellum. (B) Western blot analysis of potential tau kinases in hippocampus and cerebral cortex of *Afg3l2*<sup>NKO</sup> mice.
