# Supplementary material
Source: PubMed Central journal article supplement (PMC4193934)
Supplement: embj0033-1011-sd5.pdf [file embj0033-1011-sd5.pdf]

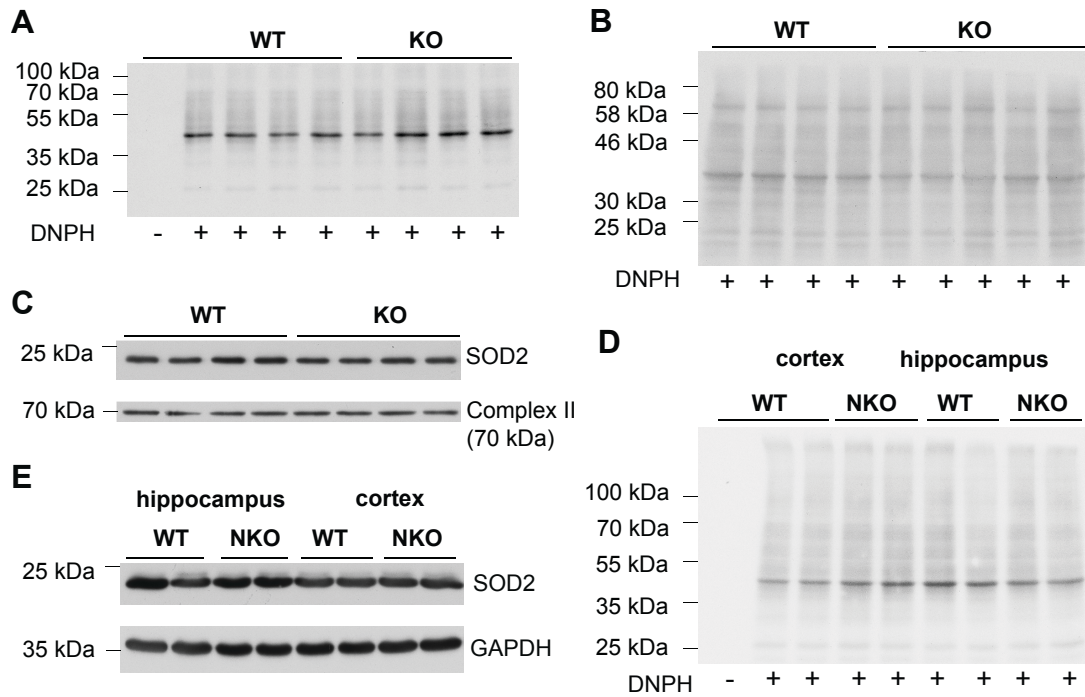

**Figure S5. *Afg3l2* mutant mice do show overt signs of oxidative damage.**

(A) Oxyblot was performed in total brain lysates of *Afg3l2* constitutive knockout (KO) and control (WT) mice. (B) Oxyblot was performed on crude mitochondria fractions isolated from WT and *Afg3l2* KO mice. (C) Western blot analysis of SOD2 level in isolated crude mitochondria fraction of WT and *Afg3l2* KO mice. (D) Oxyblot was performed in cortex and hippocampus lysates of *Afg3l2* forebrain neuronal specific knockout (NKO) and control littermates (WT). (E) Western blot analysis of SOD2 in cortex and hippocampus lysates of *Afg3l2* conditional NKO and WT.
