# Supplementary material
Source: PubMed Central journal article supplement (PMC4193934)
Supplement: embj0033-1011-sd6.pdf [file embj0033-1011-sd6.pdf]

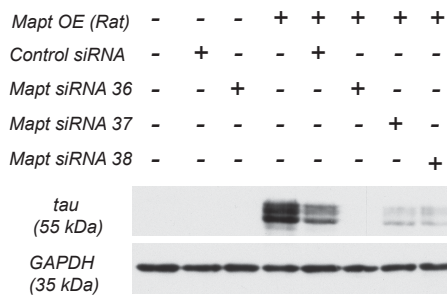

**Figure S6. Characterization of *Mapt* siRNAs.**

Western blot analysis of the levels of overexpressed rat tau together with control or specific *Mapt* siRNAs. *Mapt* siRNA 36 was selected for further studies.
