# Supplementary material
Source: PubMed Central journal article supplement (PMC4193934)
Supplement: embj0033-1011-sd7.pdf [file embj0033-1011-sd7.pdf]

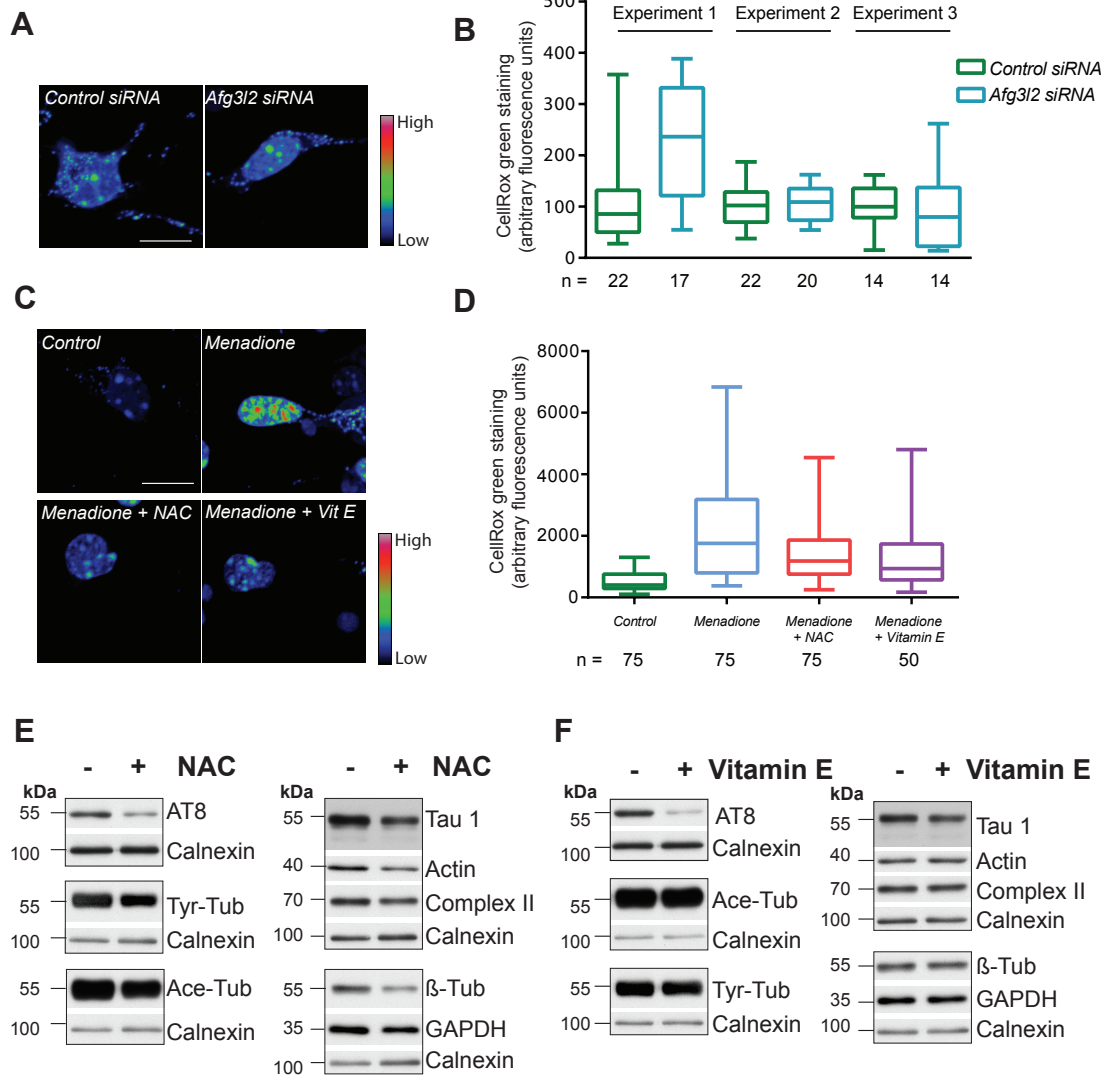

### **Figure S7. Effects of antioxidants on ROS and tau levels**

(A) Representative images of CellROX intensities, shown in pseudocolour, in the soma of neurons knocked down using control or *Afg3l2* specific siRNA oligonucleotides. Bar: 10  $\mu$ m. (B) Boxplots showing CellROX intensities in three independent experiments (n = 14-22 neurons from each experiment). (C) Representative images of CellROX intensities, shown in pseudocolour, in the soma of neurons untreated, and treated with menadione, menadione and NAC, or menadione and vitamin E. Bar: 10  $\mu$ m. (D) Boxplot showing CellROX intensities in one representative experiment (n = 50-75 neurons for each condition). (E) Western blots of murine primary cortical neurons grown in medium without and with NAC. Reduced levels of beta-tubulin, acetylated tubulin, tyrosinated tubulin, actin, tau, and phospho-tau are observed in NAC-treated neurons. (F) Western blots of murine primary cortical neurons grown in medium without and with vitamin E. Reduced level of phospho-tau is observed in vitamin E-treated neurons.
