# Supplementary material
Source: PubMed Central journal article supplement (PMC4193934)
Supplement: embj0033-1011-sd8.pdf [file embj0033-1011-sd8.pdf]

## **Supplementary material**

### **Supplementary material and methods**

#### **Biochemical experiments**

Crude brain mitochondria of *Afg3l2* constitutive knockout and wild type mice were isolated as described (Wieckowski et al, 2009). Neurons were lysed in RIPA buffer (150 mM NaCl, 50 mM Tris–HCl pH 7.4, 5 mM EDTA, 1% Triton X-100, 1% sodium deoxycholate, 0.1% SDS) supplemented with protease inhibitor cocktail (Roche) on ice. 20 µg of mitochondrial proteins or 10 µg of total proteins were used for western blot. Anti-phospho-GSK-3α/β (Ser21/9), anti- GSK3 β, anti-p35/25 antibodies, anti-phospho-MARK Family (Activation Loop) were obtained from Cell Signaling; anti-CDK5 from Abcam; anti-MnSOD (SOD2), anti-GAPDH, anti-Tau1 and anti-Actin from Millipore; anti-complex II 70 kDa from Invitrogen; AT8 antibody from Pierce; anti-acetylated tubulin, anti-tyrosinated tubulin, anti-β-tubulin from Sigma-Aldrich; anti-calnexin from Enzo life science. Anti-AFG3L2 antibodies were previously described (Koppen et al, 2007). Detection of carbonylated proteins was performed using the Oxyblot kit (Millipore), according to the manufacturer's instructions.

#### ***Afg3l2*, *Opa1*, *Mapt*, and RNA interference**

To downregulate *Afg3l2*, we used Stealth siRNAs synthesized by Invitrogen with the following sequences:

siRNA B: 5'-GCGUUCUCUGCUGAGGGAUGUAAUU-3'

siRNA C: 5'-GGUUGAUGGGCAAUACGUCUGGUUU-3'

To downregulate *Opa1*, we used Stealth siRNAs synthesized by Invitrogen with the following sequences:

siRNA A: 5'-CAAGAGCAGUGUGUUCACAACGAAA-3'

siRNA B: 5'-CAGUGUUCUGUAUUCAGGAACGCUU-3'

To downregulate *Mapt*, we used Stealth siRNAs synthesized by Invitrogen with the following sequence:

siRNA 36: 5'-CAGUCGAAGAUUGGCUCCUUGGAUA-3'

siRNA 37: 5'-CAGGAGGUGGCAAGGUGCAGAUAAU-3'

siRNA 38: 5'-CAGGAGGUGGCCAGGUGGAAGUAAA-3'

A construct containing the full length sequence of rat *Mapt* cDNA in the vector pExpress-1 was used for overexpression in MEFs (kind gift of Dr. Walter Becker).

### **Quantification of mitochondrial membrane potential with TMRM**

Primary cortical neuronal cultures were stained with 10 nM TMRM (Sigma) for 3 hours. As a positive control, 20  $\mu$ M CCCP (sigma) was added for two hours after adding TMRM. Images were obtained at a excitation wavelength of 561 nm. Average pixel intensities of TMRM were quantified in the soma of neurons by using Volocity 6.1 (Perkin-Elmer).

### **Transfection of parkin-mCherry**

parkin-mCherry (400 ng) and mito-GFP (200 ng) constructs were co-transfected together with 100 nM of the respective siRNA by electroporation. Primary cortical neuronal cultures treated with 100  $\mu$ M antimycin A for 40 min

acted as a positive control. Images of the axons were collected at excitation wavelength of 488 nm (mito-GFP) and 561 nm (parkin-mCherry).

### **CellROX experiments**

To measure cellular ROS, primary cortical neurons were stained with 2.5  $\mu$ M CellROX green (Life Technologies) for 30 min. The neurons were washed twice with pre-conditioned neuronal medium and imaged in the same. As a positive control for ROS production, 100  $\mu$ M menadione (Sigma) was added for 45 min prior to addition of CellROX green reagent. NAC (1 mM) or vitamin E (200  $\mu$ M) were added with menadione to the neuronal medium. Average pixel intensities of CellROX green were quantified in the soma of neurons by using Volocity 6.1 (Perkin-Elmer).

### **Supplementary References**

Koppen M, Metodiev MD, Casari G, Rugarli EI, Langer T (2007) Variable and tissue-specific subunit composition of mitochondrial m-AAA protease complexes linked to hereditary spastic paraplegia. *Mol Cell Biol* **27**: 758-767

Wieckowski MR, Giorgi C, Lebiedzinska M, Duszynski J, Pinton P (2009) Isolation of mitochondria-associated membranes and mitochondria from animal tissues and cells. *Nat Protoc* **4**: 1582-1590
