# Supplementary material
Source: PubMed Central journal article supplement (PMC4193934)
Supplement: embj0033-1011-sd9.pdf [file embj0033-1011-sd9.pdf]

**Supplementary Table 1.** Percentage of stationary mitochondria in different experiments of this study ( $\pm$  SEM).

|                  |                                              |                                             |                             |                       |
|------------------|----------------------------------------------|---------------------------------------------|-----------------------------|-----------------------|
| <b>Figure 1</b>  | <i>Control</i>                               | <i>Afg3l2 (A)</i>                           |                             |                       |
|                  | 60.5 $\pm$ 2.8                               | 71.9 $\pm$ 7.8                              |                             |                       |
| <b>Figure 2</b>  | <i>Control in OMA1<sup>-/-</sup> neurons</i> | <i>Afg3l2 in OMA1<sup>-/-</sup> neurons</i> |                             |                       |
|                  | 70.0 $\pm$ 4.4                               | 80.5 $\pm$ 2.6                              |                             |                       |
| <b>Figure 5</b>  | <i>Control</i>                               | <i>Mapt</i>                                 | <i>Afg3l2 + control</i>     | <i>Afg3l2 + Mapt</i>  |
|                  | 69.6 $\pm$ 2.2                               | 64.8 $\pm$ 1.2                              | 74.4 $\pm$ 4.0              | 74.2 $\pm$ 1.0        |
| <b>Figure 6</b>  | <i>Control</i>                               | <i>Control + NAC</i>                        | <i>Afg3l2</i>               | <i>Afg3l2 + NAC</i>   |
|                  | 69.7 $\pm$ 0.4                               | 60.6 $\pm$ 1.6                              | 83.9 $\pm$ 1.27             | 63.4 $\pm$ 2.3        |
| <b>Figure 7</b>  | <i>Control</i>                               | <i>Control + Vit E</i>                      | <i>Afg3l2</i>               | <i>Afg3l2 + Vit E</i> |
|                  | 76.0 $\pm$ 2.6                               | 70.0 $\pm$ 2.9                              | 80.1 $\pm$ 4.0              | 75.1 $\pm$ 1.72       |
| <b>Figure S1</b> | <i>Control</i>                               | <i>Afg3l2 (B)</i>                           | <i>Afg3l2 (C)</i>           |                       |
|                  | 60.7 $\pm$ 3.4                               | 73.5 $\pm$ 2.8 ( $p= 0.04$ )                | 75.0 $\pm$ 1.1 ( $p=0.01$ ) |                       |
| <b>Figure S3</b> | <i>Control</i>                               | <i>OPA1 (A)</i>                             | <i>OPA1 (B)</i>             |                       |
|                  | 71.1 $\pm$ 3.0                               | 69.0 $\pm$ 3.6                              | 72.9 $\pm$ 3.2              |                       |

$p$  value was determined with Student's t-test and is shown only when significant.
