# Supplementary material
Source: PubMed Central journal article supplement (PMC4193934)

# Figure 3F

Arrowheads indicate Tau1 or phospho-tau, asterisks indicate GAPDH bands

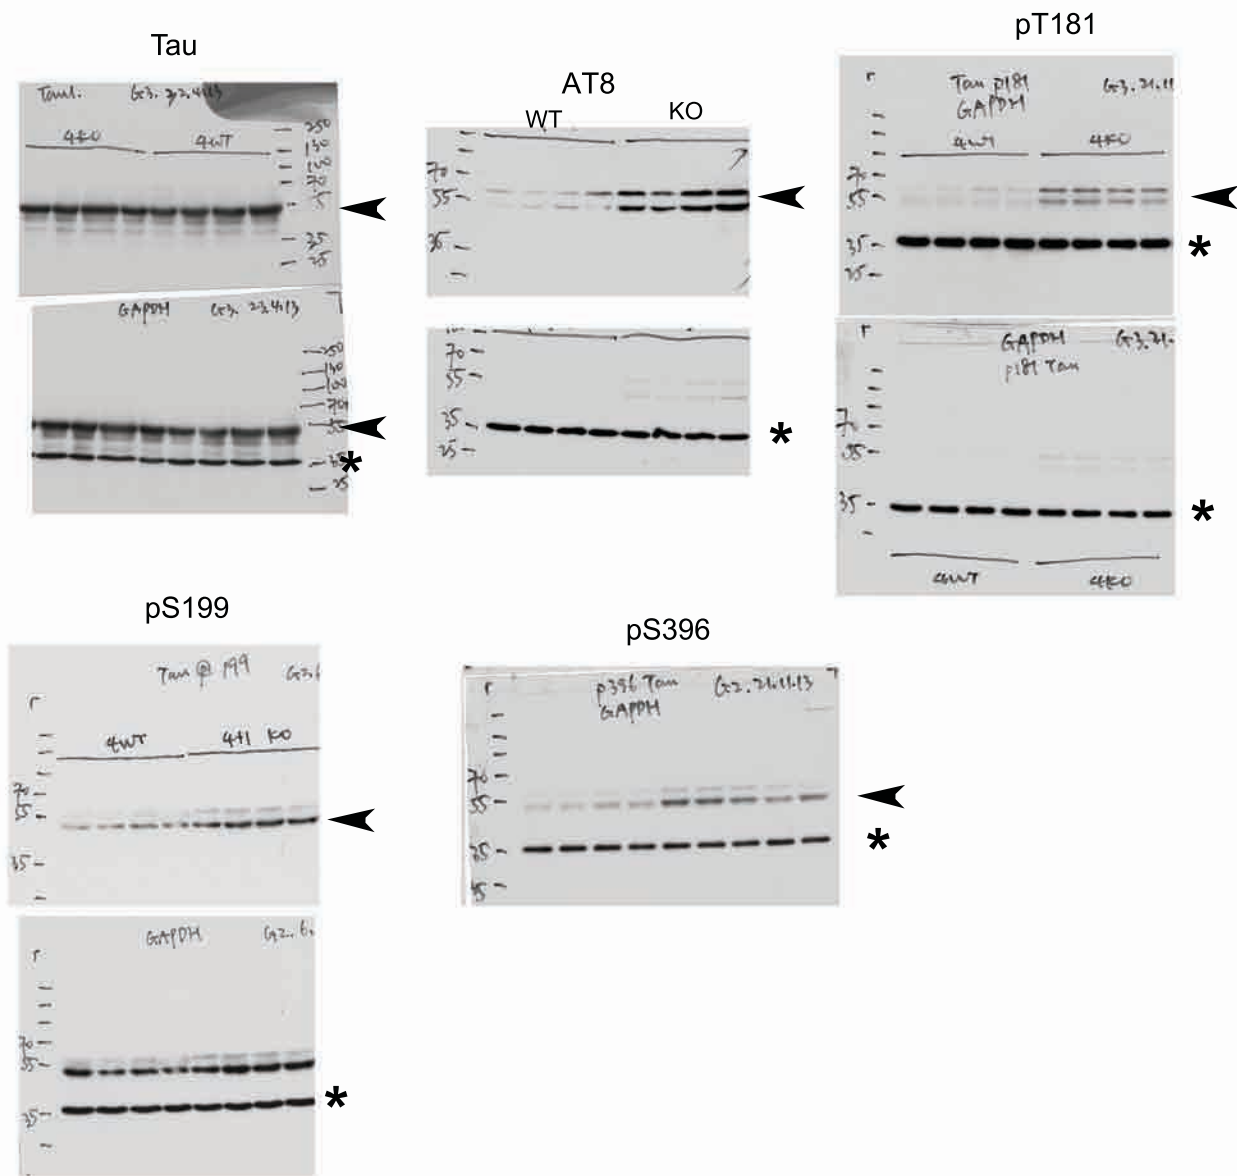

Supplement: embj0033-1011-sd11.pdf [file embj0033-1011-sd11.pdf]

**Figure 4C**

Arrowheads indicate phospho-tau, asterisks GAPDH bands

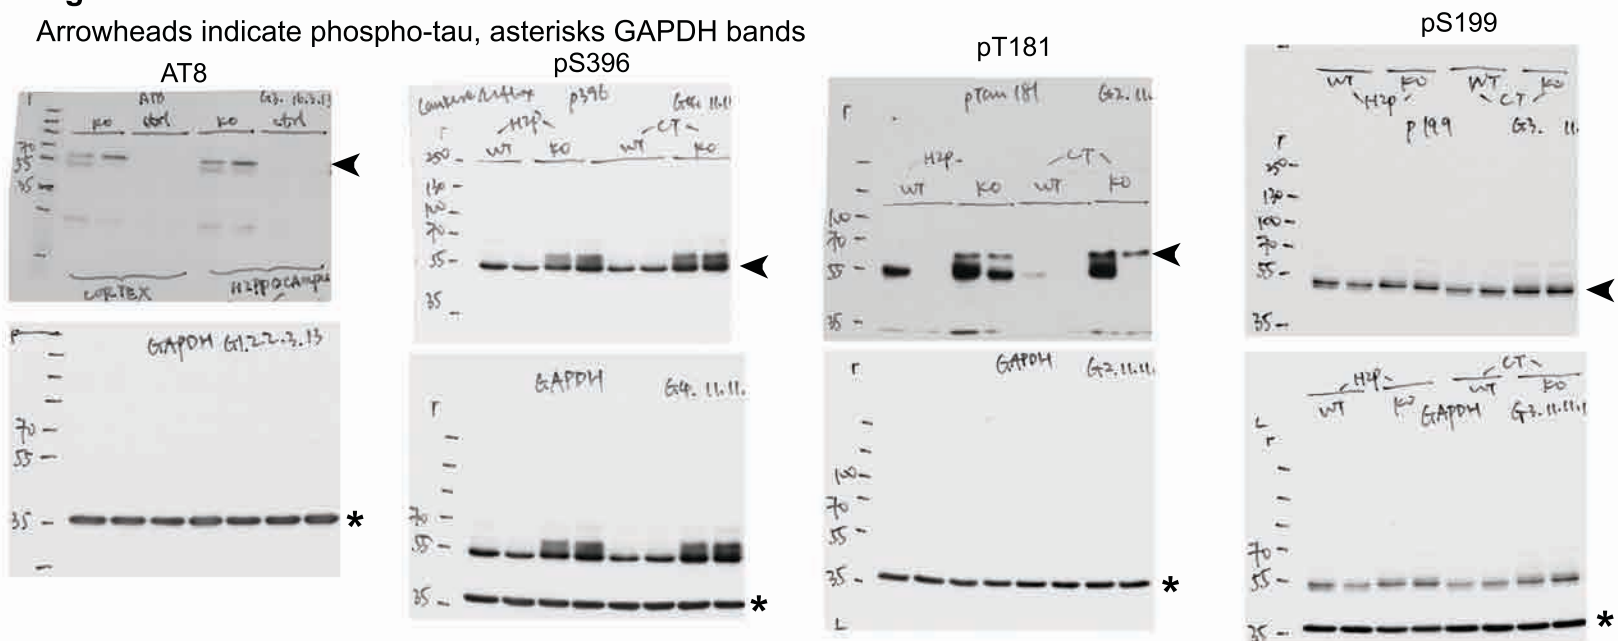

**Figure 4D**

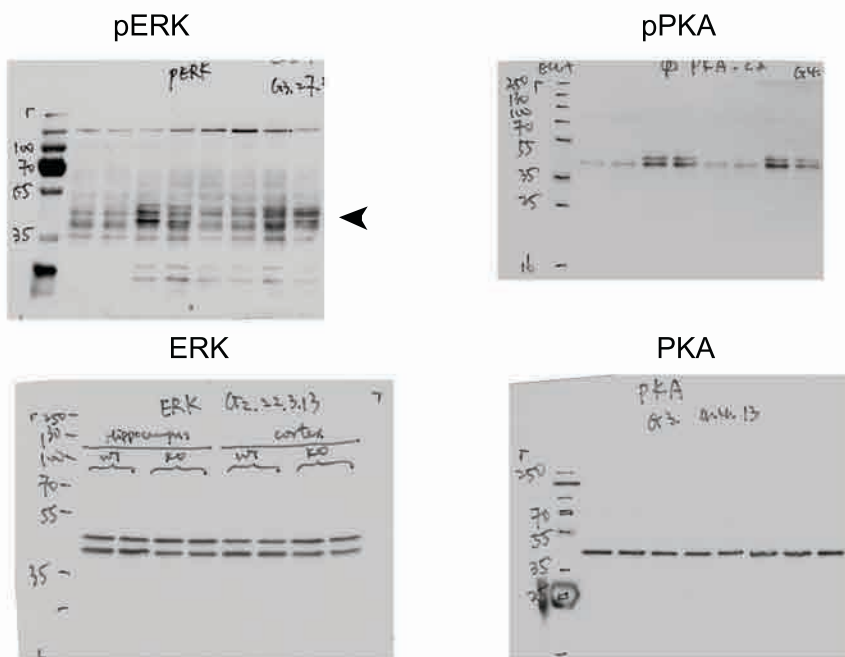

Supplement: embj0033-1011-sd12.pdf [file embj0033-1011-sd12.pdf]
